# Supplementary material for: Mexican Colorectal Cancer Research Consortium (MEX-CCRC): Etiology, Diagnosis/Prognosis, and Innovative Therapies
Source: MDPI journal article supplement (doi:10.3390/ijms24032115), 2023-01-20
Supplement: s1 [file s1]

## Unidad de Investigación en Biomedicina

### Research line

Cell signalling in cancer

Lung Diseases And Cancer  
Epigenomics

Biochemistry and Bioenergetics

Immunoregulation in parasitic and  
chronic-degenerative diseases

Carcinogenesis and toxicology

Tumor immunity

Immunology and host-organism  
interactions

Functional genomics of cancer

Experimental immunology and  
regulation of hepato-intestinal  
inflammation

Integrative genomics and  
molecular biology of cancer

Innate Immunity

### Director

Luis E. Arias-Romero

Federico Ávila-Moreno

Emma B. Gutiérrez-Cirlos-Madrid

Luis I. Terrazas

Yolanda I. Chirino

Sonia Leon-Cabrera

Araceli Perez-Lopez

Carlos Pérez-Plasencia

José L. Reyes

Felipe Vaca-Paniagua

Miriam Rodríguez-Sosa

### Manager

Olga Villamar-Cruz

Leonel Armas-López

Mónica G. Mendoza-Rodríguez

Norma L. Delgado-Buenrostro

Verónica García-Castillo

Imelda Juárez-Avelar

## Laboratorio Nacional en Salud: Diagnóstico Molecular y Efecto Ambiental en Enfermedades Crónico-Degenerativas.

### Research line

Flow cytometry department

Massive sequencing department

### Director

Jonadab E. Olguín

Felipe Vaca-Paniagua

## Subdirección de Investigación Básica, Instituto Nacional de Cancerología

Yessenia Sánchez-Pérez

## Programa de Doctorado en Ciencias Biomédicas

Antonio Andrade-Meza

**Figure S1.** The current members of The Mexican Colorectal Cancer Research Consortium (MEX-CCRC).
